# Supplementary material for: Mesoporous carbon cubes derived from fullerene crystals as a high rate performance electrode material for supercapacitors
Source: Royal Society of Chemistry journal article supplement (doi:10.1039/c9ta00520j), 2019-01-01
Supplement: c9ta00520j1.pdf [file c9ta00520j1.pdf]

## Electronic Supporting Information (ESI)

# Mesoporous Carbon Cubes Derived from Fullerene Crystals as a High Rate Performance Electrode Material for Supercapacitors

Partha Bairi,<sup>a</sup> Subrata Maji,<sup>a</sup> Jonathan P. Hill,<sup>a</sup> Jung Ho Kim,<sup>b</sup> Katsuhiko Ariga<sup>a,c</sup> and Lok Kumar Shrestha<sup>a\*</sup>

*<sup>a</sup>International Center for Materials Nanoarchitectonics (WPI-MANA), National Institute for Materials Science (NIMS), 1-1 Namiki, Tsukuba 305-0044, Japan*

*<sup>b</sup>Institute for Superconducting and Electronic Materials (ISEM), Australian Institute for Innovative Materials (AIIM), University of Wollongong, North Wollongong, NSW 2500, Australia*

*<sup>c</sup>Graduate School of Frontier Science, The University of Tokyo, Kashiwa, Chiba 277-0827, Japan*

Contact: [SHRESTHA.Lokkumar@nims.go.jp](mailto:SHRESTHA.Lokkumar@nims.go.jp)

## Contents

|                                                                                                       |     |
|-------------------------------------------------------------------------------------------------------|-----|
| 1. SEM images of MCFC .....                                                                           | S3  |
| 2. TEM observations of MCFC.....                                                                      | S4  |
| 3. FT-IR spectra and Thermogravimetric Analysis of MCFC.....                                          | S5  |
| 4. SEM images of MCFC-900.....                                                                        | S6  |
| 5. TEM images of MCFC-900.....                                                                        | S7  |
| 6. HR-TEM images of MCFC-900.....                                                                     | S8  |
| 7. SEM images of MCFC-2000.....                                                                       | S9  |
| 8. TEM images of MCFC-2000.....                                                                       | S10 |
| 9. HR-TEM images of MCFC-2000 .....                                                                   | S11 |
| 10. Pore size distribution from BJHA method .....                                                     | S12 |
| 11. Porosity parameters of MCFC, MCFC-900 and MCFC-2000 .....                                         | S13 |
| 12. Additional XPS data .....                                                                         | S14 |
| 13. CV curves of MCFC and calculated specific capacitance .....                                       | S15 |
| 14. CV curves of MCFC-1500 and MCFC-2000.....                                                         | S16 |
| 15. Additional charging-discharging data .....                                                        | S17 |
| 16. Comparison of electrochemical performance of MCFC-900 with<br>other porous carbon materials ..... | S18 |

1. SEM images of MCFC

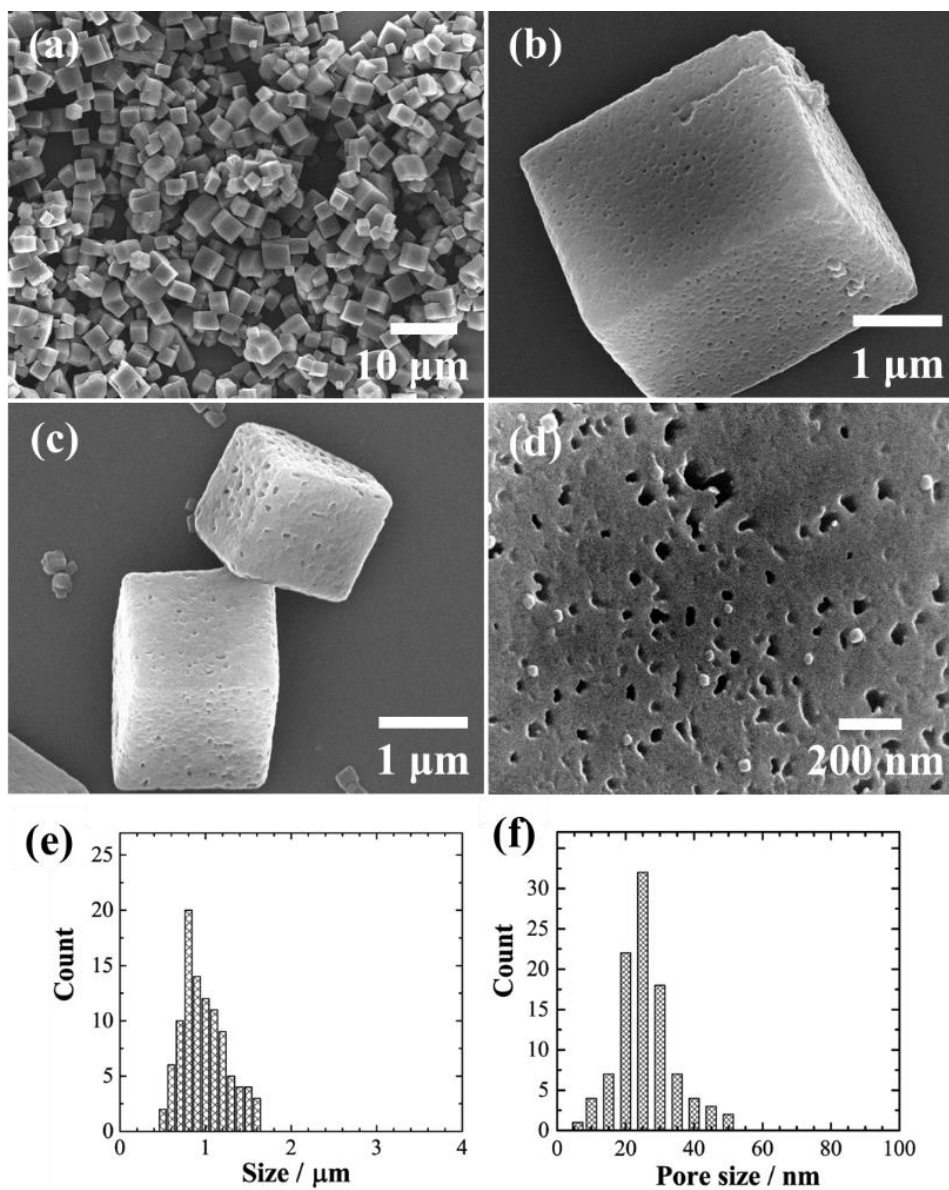

**Figure S1:** (a-d) SEM images of MCFC. (e) Edge size distribution of MCFC. (f) Pore size distribution of MCFC.

## 2. TEM observations of MCFC

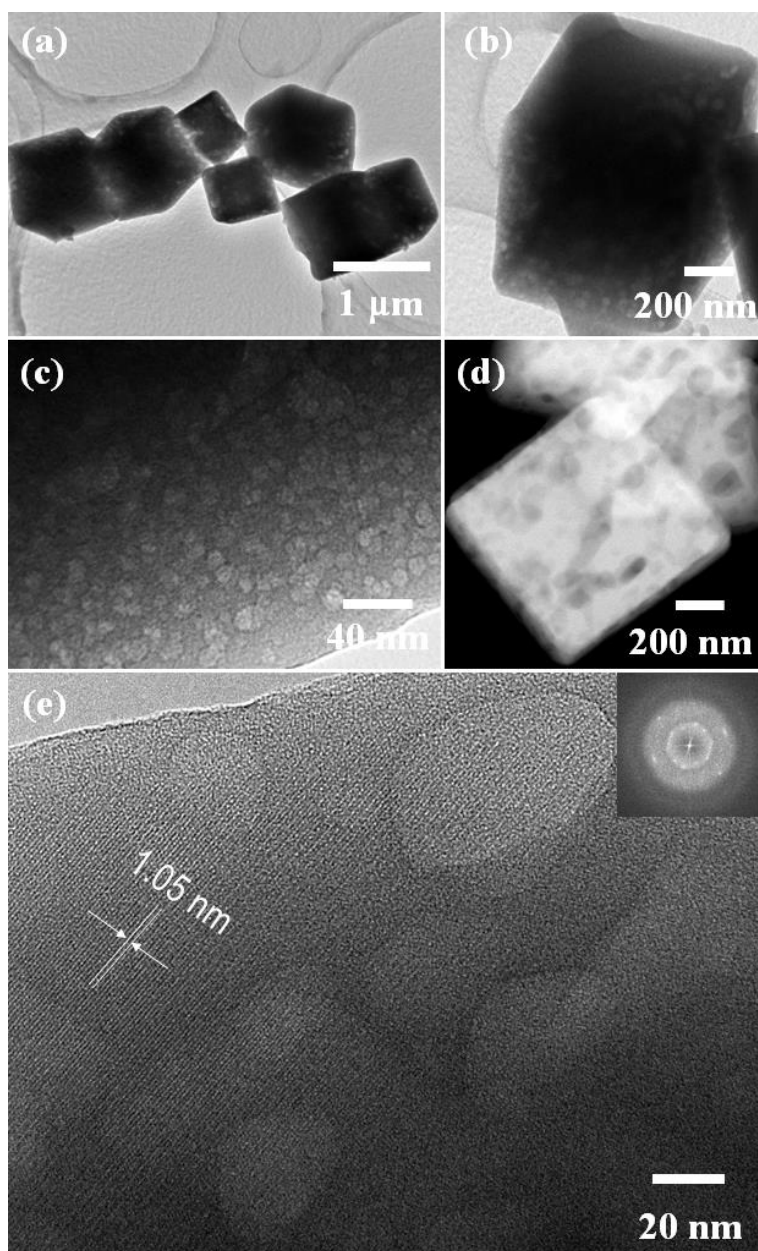

**Figure S2:** (a-c) and (d) TEM and STEM images of MCFC, respectively. (e) HR-TEM image of the MCFC.

### 3. FT-IR spectra and Thermogravimetric Analysis of MCFC

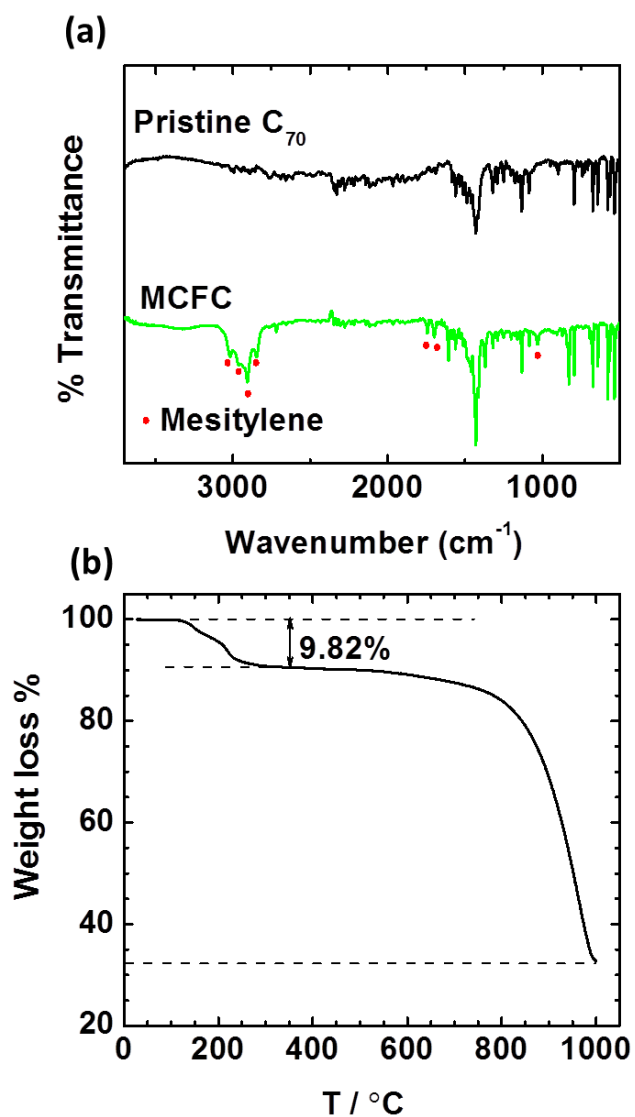

**Figure S3:** (a) FT-IR spectra of MCFC and together with pristine C<sub>70</sub> and (b) thermogravimetric analysis of MCFC.

4. SEM images of MCFC-900

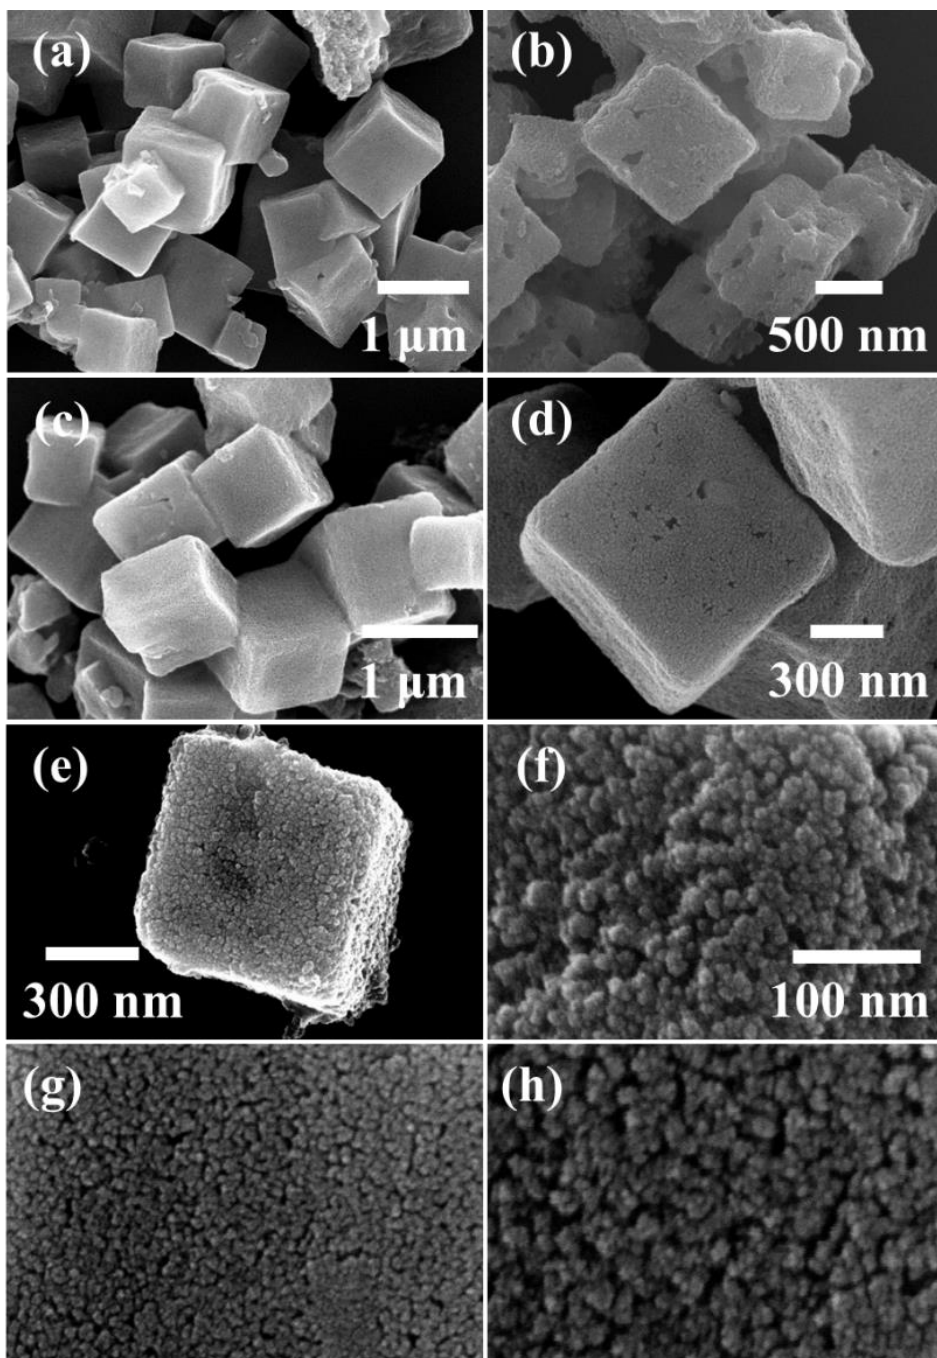

Figure S4: (a-e) SEM and (f-h) high resolution SEM images of MCFC-900.

5. TEM images of MCFC-900

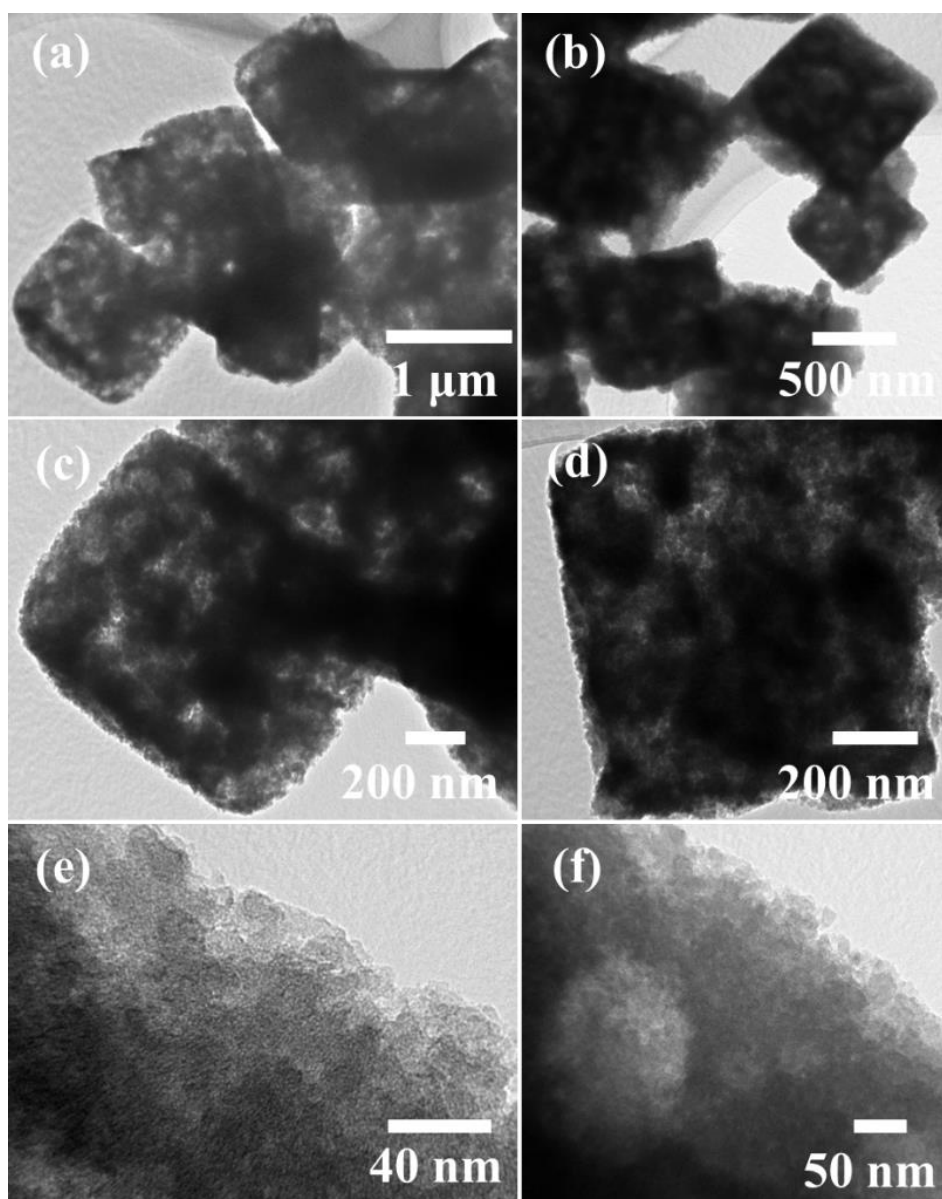

Figure S5: TEM images of MCFC-900.

6. HR-TEM images of MCFC-900

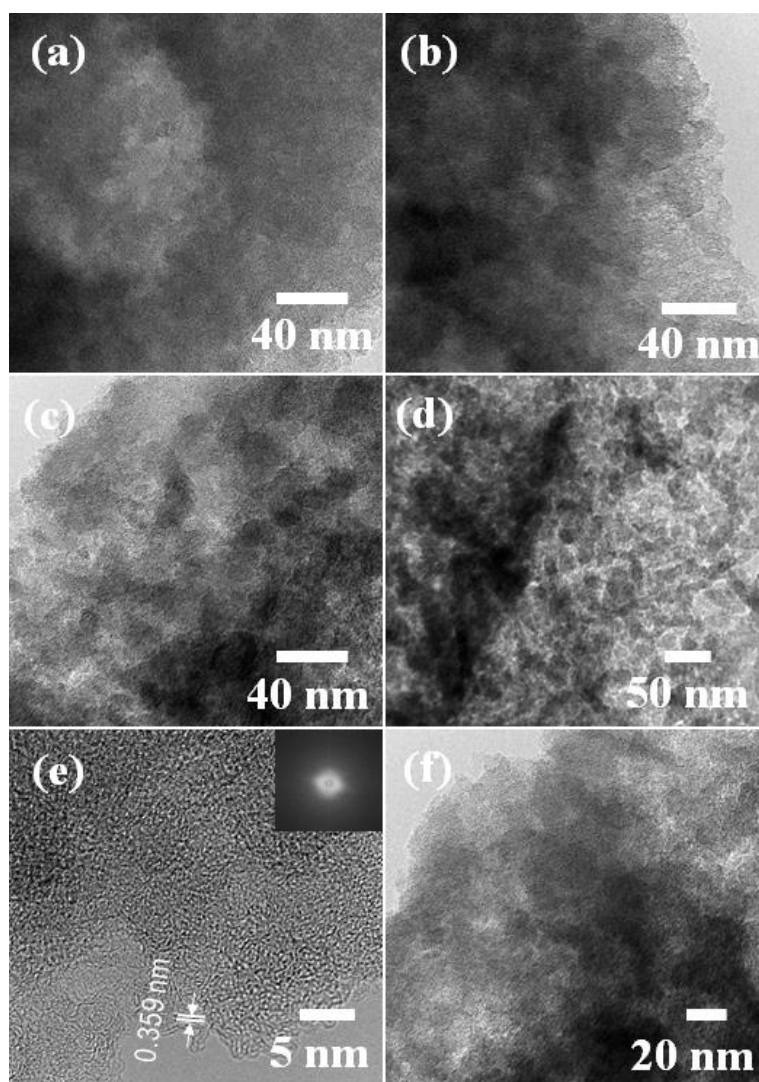

Figure S6: High resolution (HR) TEM images of MCFC-900.



7. SEM images of MCFC-2000

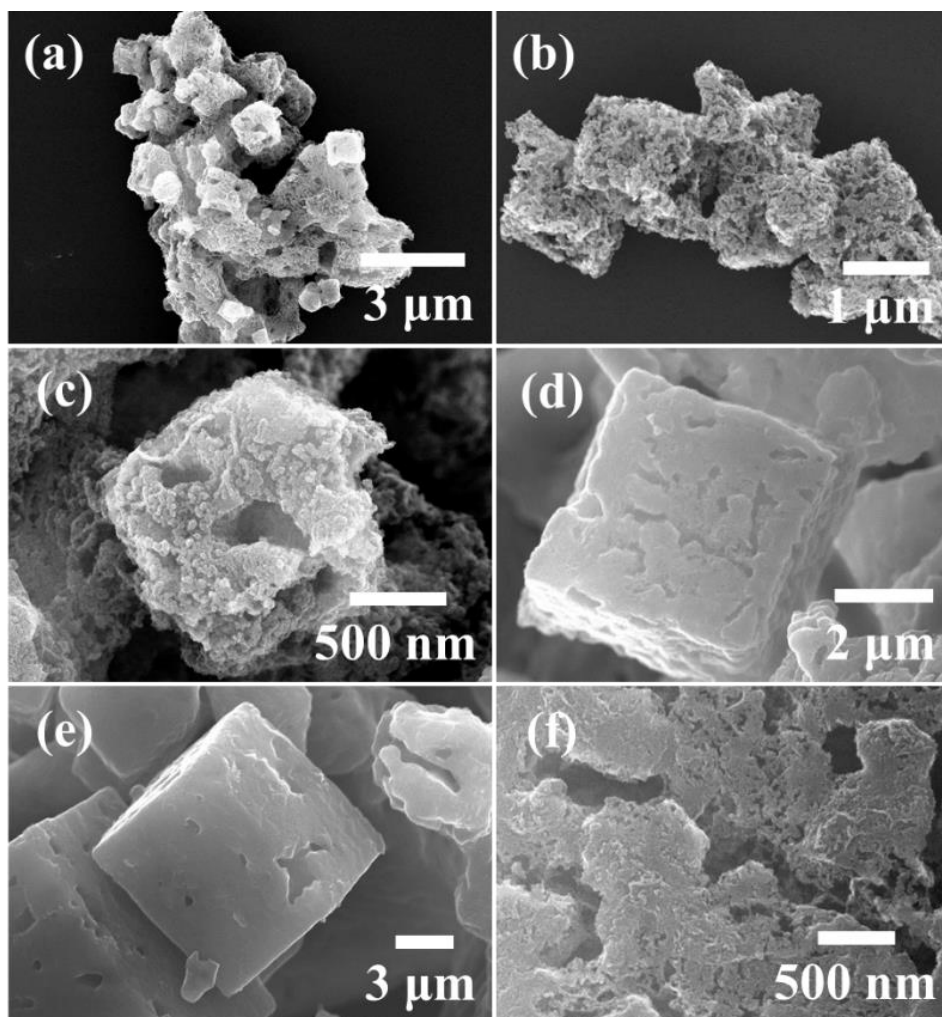

Figure S8: SEM images of MCFC-2000.

8. TEM images of MCFC-2000

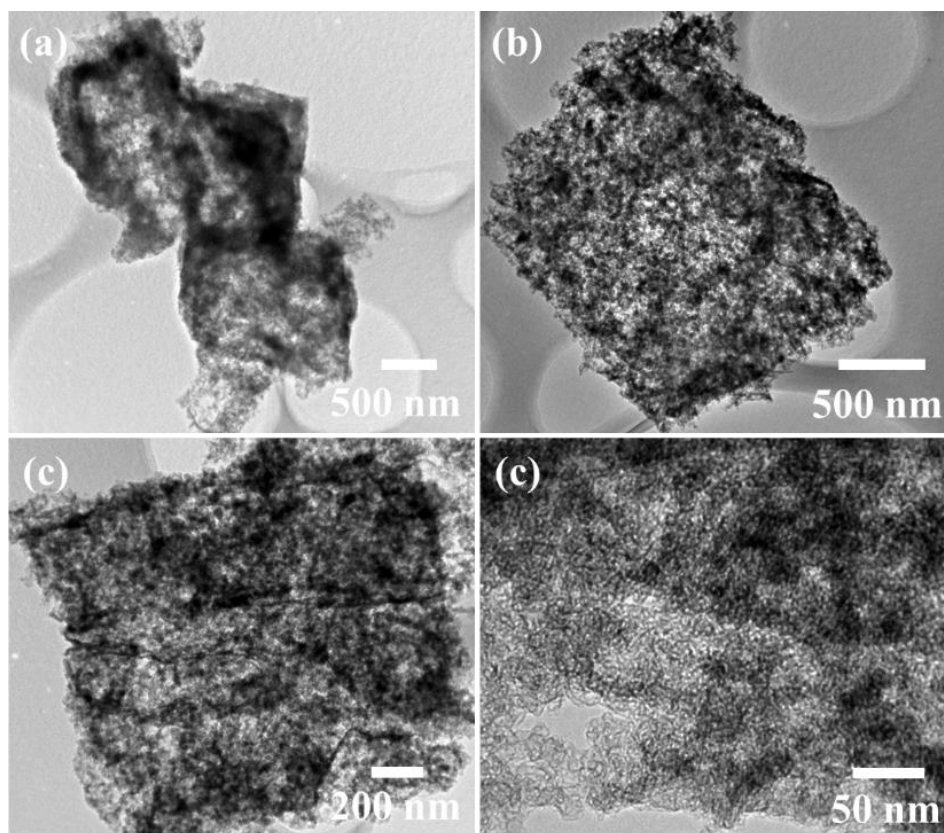

Figure S9: TEM images of MCFC-2000.

9. HR-TEM images of MCFC-2000

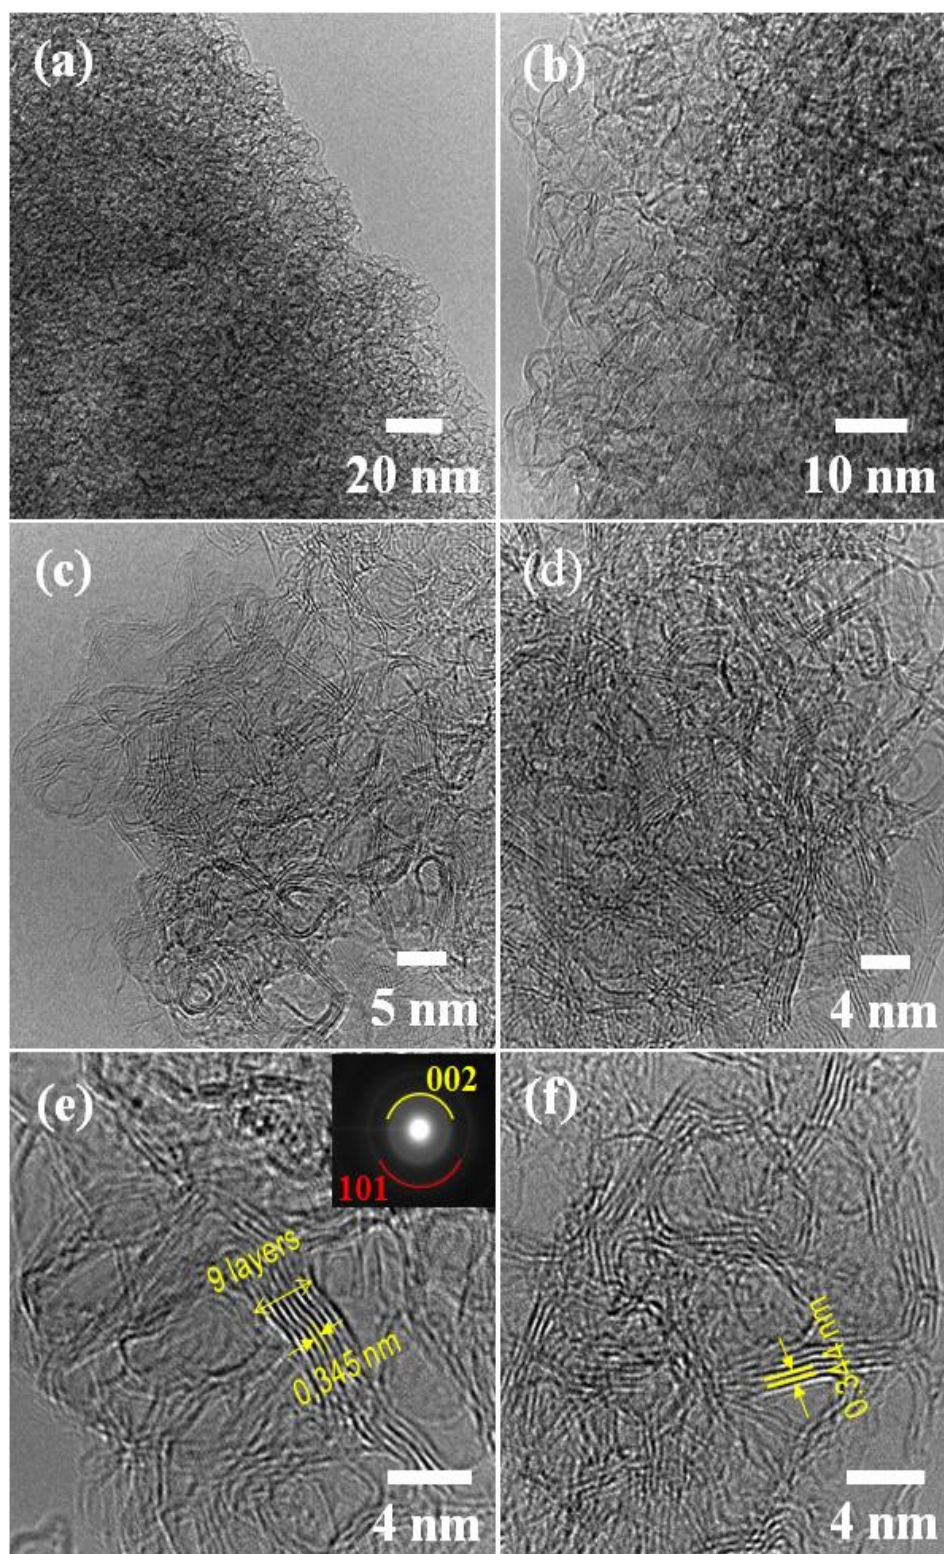

Figure S10: HR-TEM images of MCFC-2000.

10. Pore size distribution from BJHA method

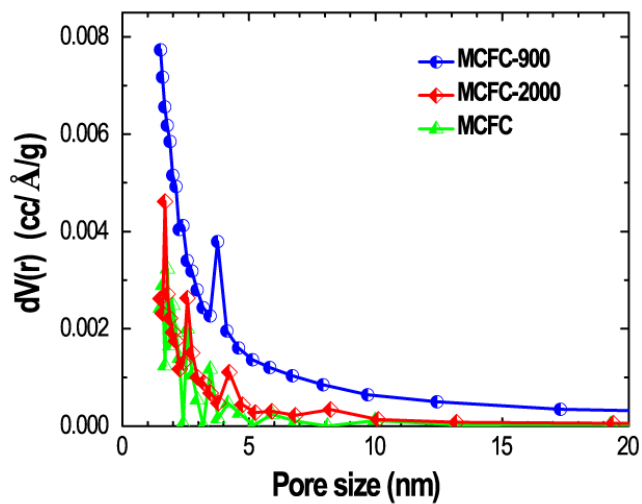

**Figure S11**—Pore size distributions of MCFC, MCFC-900 and MCFC-2000 obtained from BJHA method.

11. Porosity properties of MCFC, MCFC-900 and MCFC-2000.

**Table S1.** Porosity properties of MCFC before and after heat-treatments.

| Sample    | $S_{BET}$ (m <sup>2</sup> /g) | $S_{mic}$ (m <sup>2</sup> /g) | $S_{meso}$ (m <sup>2</sup> /g) | $V_t$ (cc/g) | $V_{mic}$ (cc/g) | $V_{meso}$ (cc/g) |
|-----------|-------------------------------|-------------------------------|--------------------------------|--------------|------------------|-------------------|
| MCFC      | 47.7                          | 19.8                          | 27.9                           | 0.111        | 0.048            | 0.065             |
| MCFC_900  | 642.6                         | 498.7                         | 143.9                          | 0.821        | 0.435            | 0.367             |
| MCFC_2000 | 76.1                          | 32.0                          | 44.1                           | 0.177        | 0.077            | 0.103             |

**Table S2.** Comparison of pore size obtained from BJHD and BJHA methods.

| Sample    | Pore size (nm) BJHD | Pore size (nm) BJHA | Pore size (nm) (Average) |
|-----------|---------------------|---------------------|--------------------------|
| MCFC      | 3.45                | 3.55                | 3.50                     |
| MCFC_900  | 3.89                | 3.00                | 3.44                     |
| MCFC_2000 | 3.09                | 3.33                | 3.21                     |

**Table S3.** Comparison of mesopore volume obtained from BJHD and BJHA methods.

| Sample    | $V_{meso}$ (cc/g) BJHD | $V_{meso}$ (cc/g) BJHA | $V_{meso}$ (cc/g) (Average) |
|-----------|------------------------|------------------------|-----------------------------|
| MCFC      | 0.063                  | 0.068                  | 0.065                       |
| MCFC_900  | 0.386                  | 0.349                  | 0.367                       |
| MCFC_2000 | 0.100                  | 0.107                  | 0.103                       |

**Table S4.** Comparison of surface area from BJHD and BJHA methods.

| Sample    | $S_{meso}$ (m <sup>2</sup> /g) BJHD | $S_{meso}$ (m <sup>2</sup> /g) BJHA | $S_{meso}$ (m <sup>2</sup> /g) Average |
|-----------|-------------------------------------|-------------------------------------|----------------------------------------|
| MCFC      | 25.2                                | 30.6                                | 27.9                                   |
| MCFC_900  | 167.8                               | 120.1                               | 143.9                                  |
| MCFC_2000 | 44.5                                | 43.7                                | 44.1                                   |

## 12. Additional XPS data

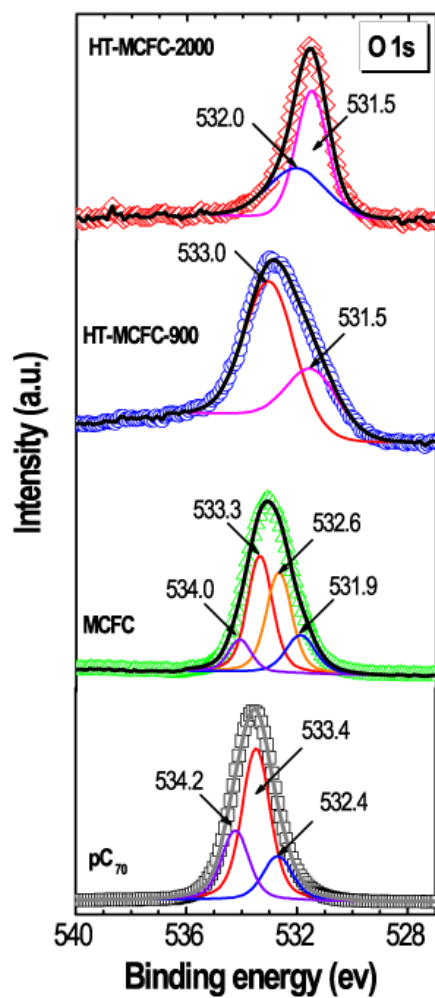

Figure S12: O 1s core level XPS spectra with peak fit.

13. CV curves of MCFC and calculated specific capacitance

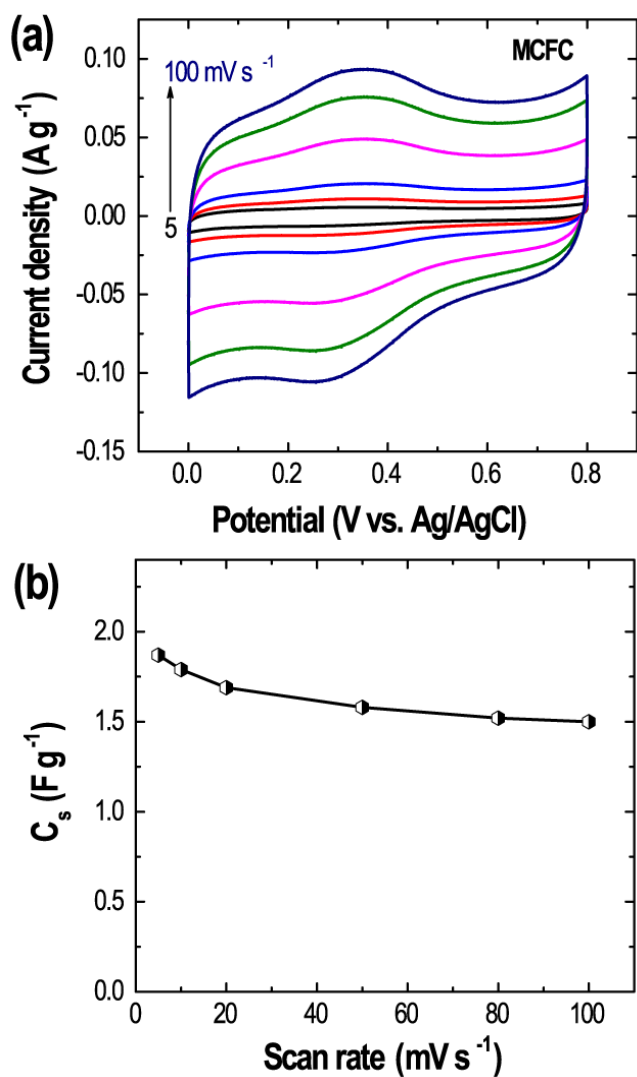

Figure S13: (a) CV curves, and (b) specific capacitance vs scan rate plot of MCFC.

14. CV curves of MCFC-1500 and MCFC-2000

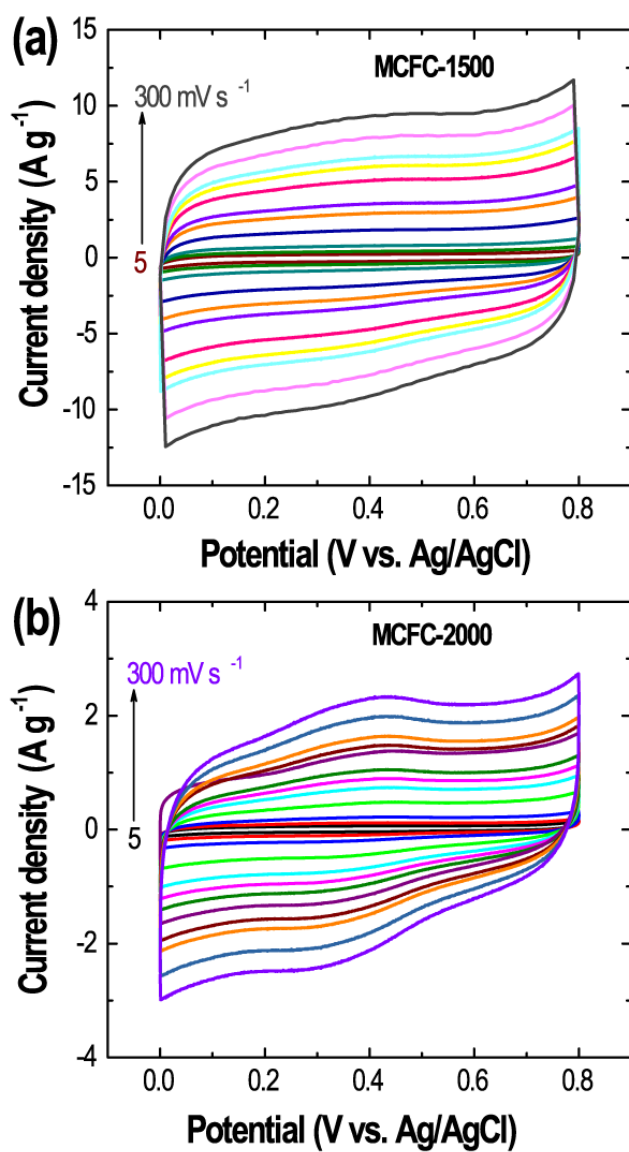

Figure S14: (a) CV curves of MCFC-1500 at different scan rates (5, 10, 20, 50, 80, 100, 200, and 300 mV s<sup>-1</sup>) and (b) Corresponding CV curves for MCFC-2000.



15. Additional charging-discharging data

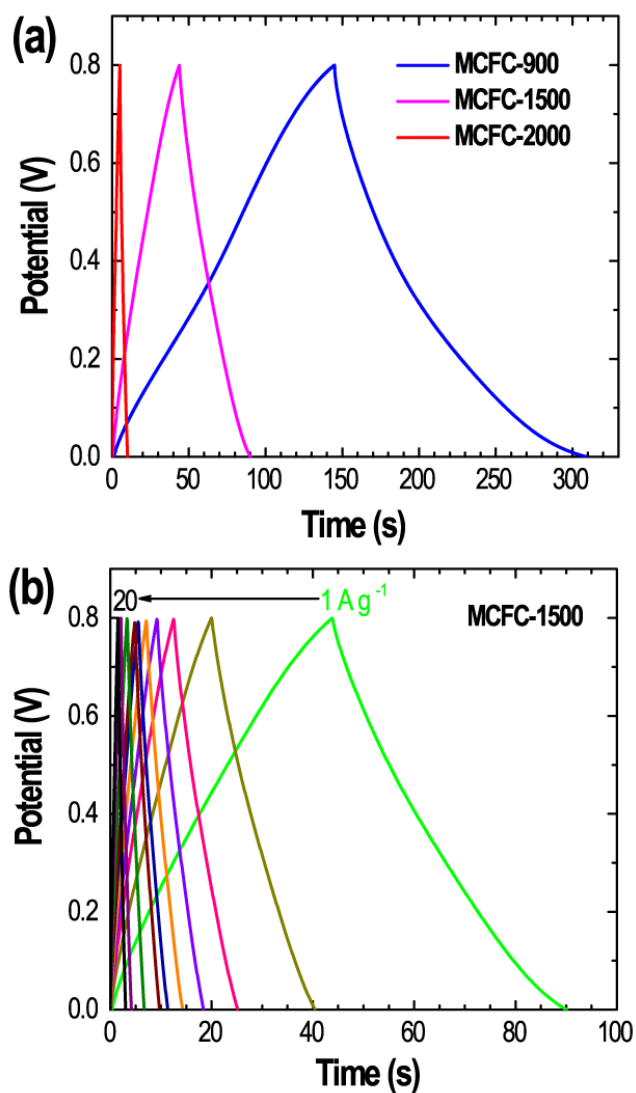

**Figure S15:** (a) Comparison of charge-discharge curves of MCFC-900, MCFC-1500 and MCFC-2000 at current density of 1 A g<sup>-1</sup> and (b) Charge-discharge curves of MCFC-1500 at different current densities (1, 2, 3, 4, 5, 6, 7, 10, 15 and 20 A g<sup>-1</sup>) as typical example.

15. Comparison of electrochemical performance of MCFC-900 with other porous carbon materials

**Table S5:** Comparison table of MCFC 900 with other carbon-based materials.

| Materials                      | Specific capacitance (F g <sup>-1</sup> ) | Scan rate or current density                            | Electrolyte                                | Ref.             |
|--------------------------------|-------------------------------------------|---------------------------------------------------------|--------------------------------------------|------------------|
| Mesoporous fullerene crystals  | 172                                       | 0.5 A g <sup>-1</sup>                                   | 6 M KOH                                    | 38               |
|                                | 141                                       | 0.5 A g <sup>-1</sup>                                   | Na <sub>2</sub> SO <sub>4</sub>            | 39               |
| Pure graphene                  | 101                                       | 20 mV s <sup>-1</sup>                                   | 5.5 M KOH                                  | 40               |
| Graphene aerogel               | 175                                       | 10 mV s <sup>-1</sup>                                   | 5 M KOH                                    | 41               |
|                                | 128                                       | 50 mA g <sup>-1</sup>                                   | 6 M KOH                                    | 42               |
| Mesoporous carbon sheets       | 275                                       | 1 mV s <sup>-1</sup>                                    | 6 M KOH                                    | 43               |
| Activated carbon               | 100                                       | 3 A g <sup>-1</sup>                                     | 30% KOH                                    | 44               |
|                                | 157                                       | 0.5 mAcm <sup>-2</sup>                                  | 1.0 M Tetraethylammonium tetrafluoroborate | 45               |
| Conventional mesoporous carbon | 205.3                                     | 5 mVs <sup>-1</sup>                                     | 30 wt% KOH                                 | 46               |
|                                | 41.5                                      | 5 mVs <sup>-1</sup>                                     | 2M NaOH                                    | 47               |
|                                | 259                                       | 1 A g <sup>-1</sup>                                     | 6 M KOH                                    | 48               |
| Nitrogen doped carbon          | 202                                       | 1 A g <sup>-1</sup>                                     | 6 M KOH                                    | 59               |
|                                | 191.9                                     | 0.1 A g <sup>-1</sup>                                   | 1 M H <sub>2</sub> SO <sub>4</sub>         | 50               |
| Boron doped carbon             | 0.26 (F m <sup>-2</sup> )                 | 2 mVs <sup>-1</sup>                                     | 6 M KOH                                    | 51               |
|                                | 228                                       | 1 mVs <sup>-1</sup>                                     | 1 M H <sub>2</sub> SO <sub>4</sub>         | 52               |
| Carbon nanotube                | 180                                       | -                                                       | 7.5 N KOH                                  | 53               |
|                                | 102                                       | 100 Hz                                                  | 38 wt % H <sub>2</sub> SO <sub>4</sub>     | 54               |
| <b>MCFC-900</b>                | <b>286</b><br><b>205</b>                  | <b>5 mV s<sup>-1</sup></b><br><b>1 A g<sup>-1</sup></b> | <b>1 M H<sub>2</sub>SO<sub>4</sub></b>     | <b>This work</b> |
